# Supplementary figures and images for: Nonenzymatic copying of RNA templates containing all four letters is catalyzed by activated oligonucleotides
Source: eLife journal article supplement (doi:10.7554/elife.17756), 2016-06-28

**a**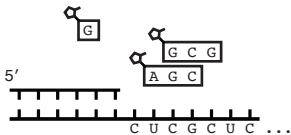**b**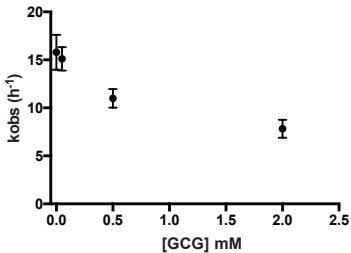

Supplement: supp [file elife-17756-supp-v1.zip]

**a**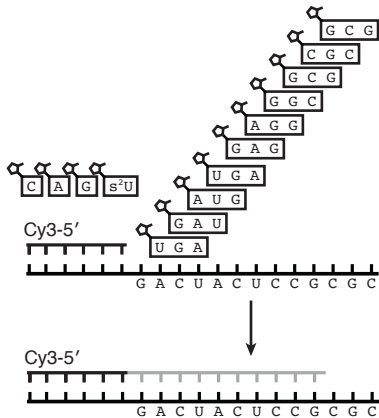**b**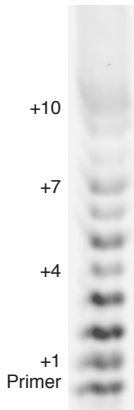

Supplement: supp [file elife-17756-supp-v1.zip]

**a**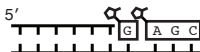**b**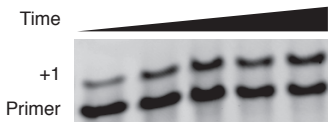**c**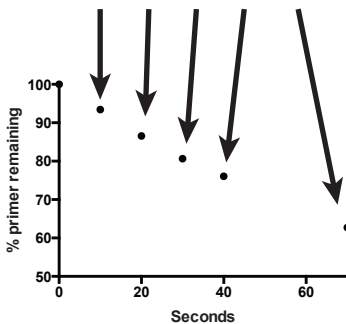**d**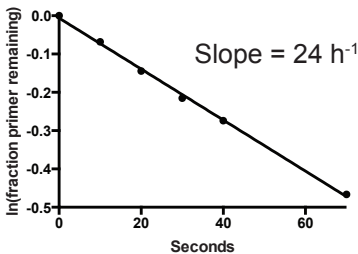

Supplement: supp [file elife-17756-supp-v1.zip]

**a**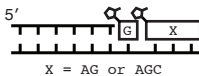**b**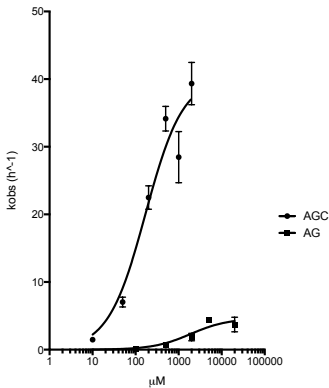

Supplement: supp [file elife-17756-supp-v1.zip]

**a**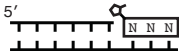**b**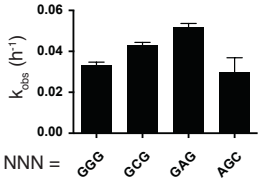

Supplement: supp [file elife-17756-supp-v1.zip]

**a**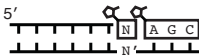**b**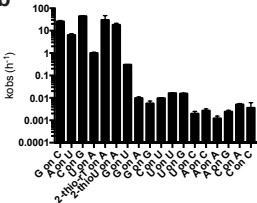**c**

|   |   | N'                 |      |       |       |
|---|---|--------------------|------|-------|-------|
|   |   | A                  | U    | C     | G     |
| N | U | 1                  | 0.02 | 0.002 | 0.02  |
|   | A | 0.001              | 6    | 0.003 | 0.002 |
|   | G | 0.01               | 0.3  | 26    | 0.006 |
|   | C | 0.005              | 0.01 | 0.004 | 44    |
|   |   | $k_{obs} (h^{-1})$ |      |       |       |

Supplement: supp [file elife-17756-supp-v1.zip]
